# Supplementary material
Source: Springer Nature journal article supplement (https://www.springermedizin.de/resource/supplementary/12889_2005_309_MOESM2_ESM.pdf/9500814)

Change in BMD  
(g/cm<sup>3</sup>)

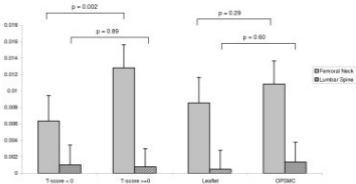

Supplement: MOESM2 [file 9500814]
